# Supplementary material
Source: PubMed Central journal article supplement (PMC3494396)
Supplement: cr2012129x2.pdf [file cr2012129x2.pdf]

**A**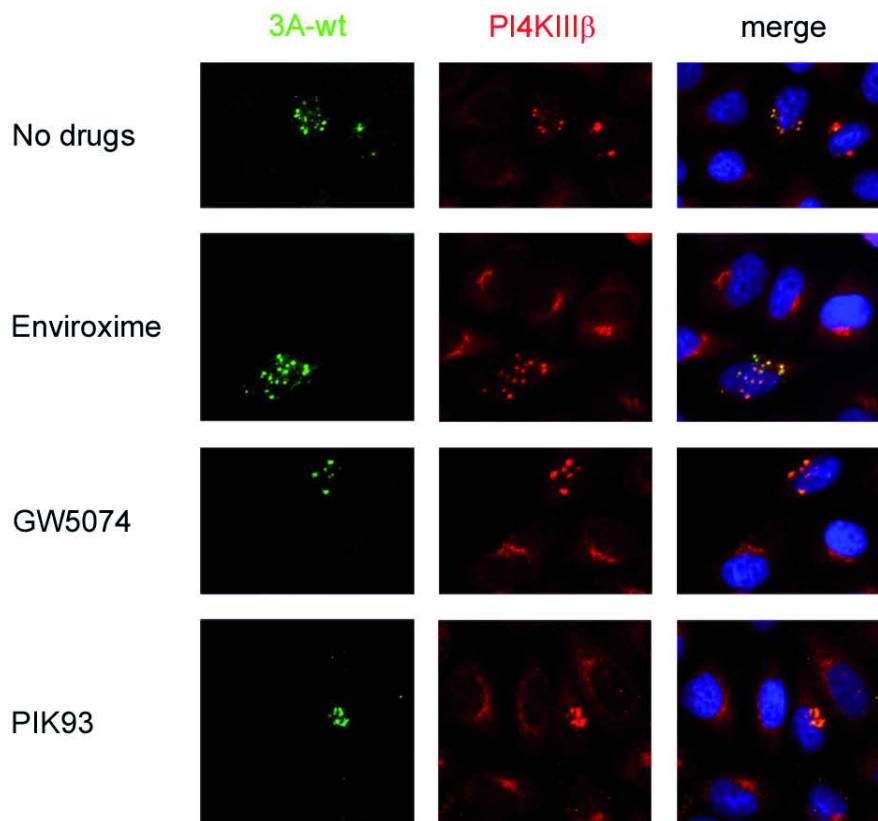**B**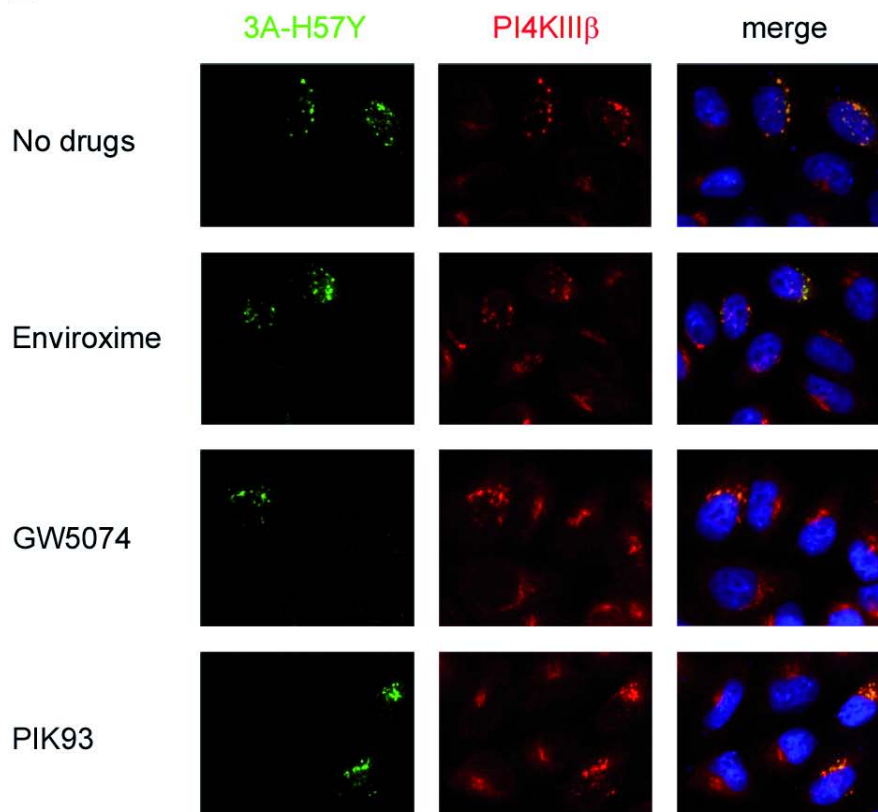

**Figure S2** Enviroxime, GW5074, and PIK93 do not affect PI4KIII $\beta$  recruitment by wild-type 3A or 3A-H57Y. HeLa cells were transfected with plasmids encoding myc-tagged wild-type 3A (**A**) or 3A-H57Y (**B**). One day after transfection, cells were treated for one hour with compounds and subsequently stained for PI4KIII $\beta$  and myc.
