# Supplementary material
Source: PubMed Central journal article supplement (PMC3494396)
Supplement: cr2012129x3.pdf [file cr2012129x3.pdf]

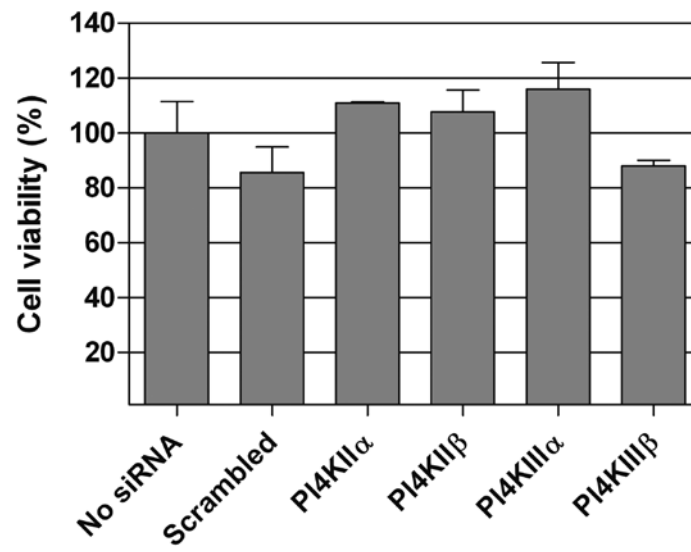

**Figure S3** SiRNA-treatment does not induce cytotoxic effects on cells. HeLa cells were transfected with scrambled siRNA or siRNA targeting PI4KII $\alpha$ , PI4KII $\beta$ , PI4KIII $\alpha$ , or PI4KIII $\beta$ . Two days after transfection, the cell viability was determined using CellTiter 96 AQueous One Solution Reagent. Cell viability of untransfected cells (no siRNA) was set to 100%.
