# Supplementary material
Source: PubMed Central journal article supplement (PMC3494396)
Supplement: cr2012129x4.pdf [file cr2012129x4.pdf]

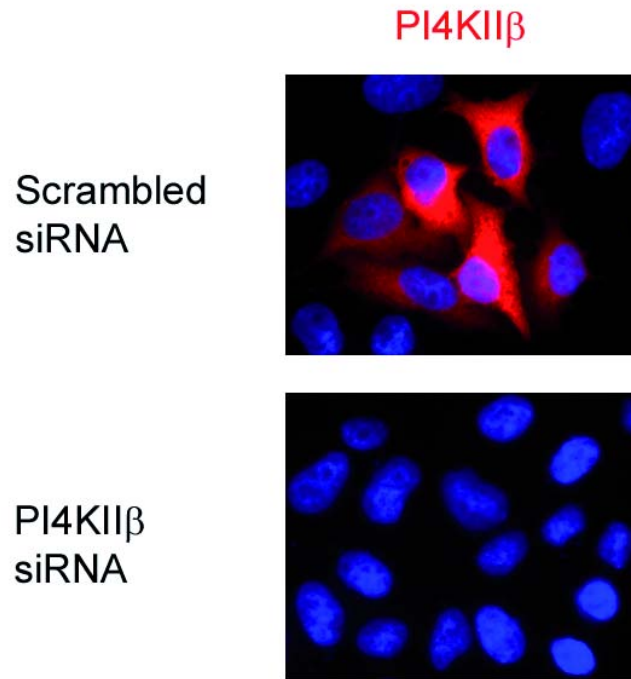

**Figure S4** Efficient depletion of PI4KII $\beta$  by siRNA-treatment. HeLa cells were transfected with scrambled siRNA or siRNA targeting PI4KII $\beta$ . One day after transfection, cells were transfected with a plasmid encoding myc-tagged PI4KII $\beta$ . At 48 hours after siRNA-treatment, cells were fixed and stained with an anti-myc antibody.
